# Supplementary material for: Effect of carbon black supports on the hydrogen evolution reaction activity of Pd nanoparticle electrocatalysts synthesized via solution plasma sputtering
Source: Royal Society of Chemistry journal article supplement (doi:10.1039/d4ra04809a), 2024-01-01
Supplement: d4ra04809a1.pdf [file d4ra04809a1.pdf]

## Supporting Information

### Effect of carbon black supports on the hydrogen evolution reaction activity of Pd nanoparticle electrocatalysts synthesized *via* solution plasma sputtering

Jidapa Chantaramethakul,<sup>a</sup> Chadapat Hussakan,<sup>a,b</sup> Yanisa Yenmankhong,<sup>a</sup> Praewpanit Chandeang,<sup>a</sup> Ratchatee Techapiesancharoenkij,<sup>a,b</sup> Wisit Hirunpinyopas,<sup>c</sup> Kasmui,<sup>d</sup> Cepi Kurniawan<sup>d</sup> and Gasidit Panomsuwan<sup>a,b\*</sup>

<sup>a</sup> Department of Materials Engineering, Faculty of Engineering, Kasetsart University, Bangkok 10900, Thailand

<sup>b</sup> International Collaborative Education Program for Materials Technology, Education, and Research (ICE-Matter), ASEAN University Network/Southeast Asia Engineering Education Development Network (AUN/SEED-Net), Kasetsart University, Bangkok, 10900, Thailand

<sup>c</sup> Department of Chemistry, Faculty of Science, Kasetsart University, Bangkok 10900, Thailand

<sup>d</sup> Chemistry Department, Faculty of Mathematics and Natural Sciences, Universitas Negeri Semarang, Semarang 50229, Indonesia

Corresponding author: gasidit.p@ku.ac.th

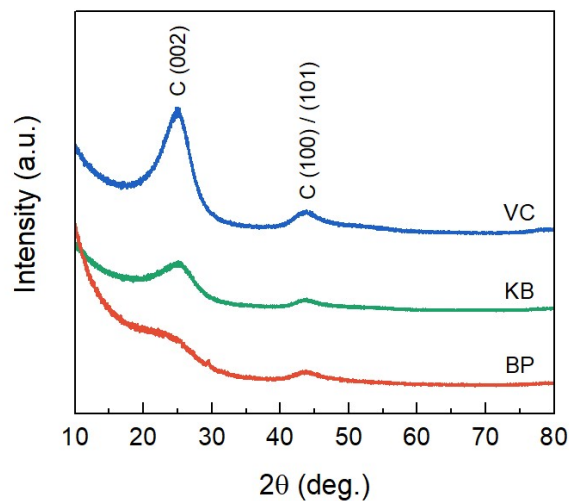

**Fig. S1.** XRD patterns of bare VC, KB, and BP supports. A small peak at 29.4° observed in BP is likely associated with trace metals from the manufacturing process or residual inorganic materials remaining after the combustion process.

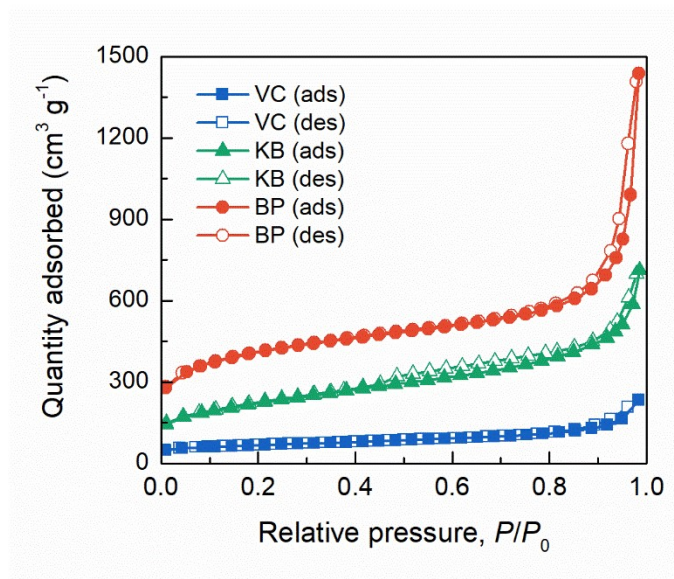

**Fig. S2.** N<sub>2</sub> adsorption-desorption isotherms of bare CB supports.

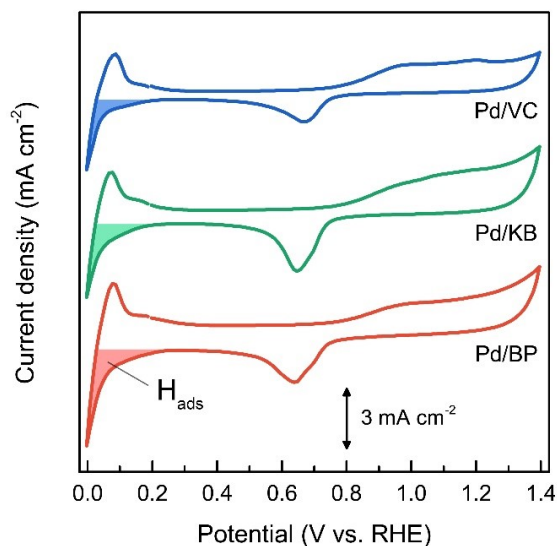

**Fig. S3.** CV curves measured in  $N_2$ -saturated 0.5 M  $H_2SO_4$  solution of Pd/VC, Pd/KB, and Pd/BP. The shaded area in the CV curves represents the hydrogen adsorption ( $H_{ads}$ ) used for the ECSA calculation.

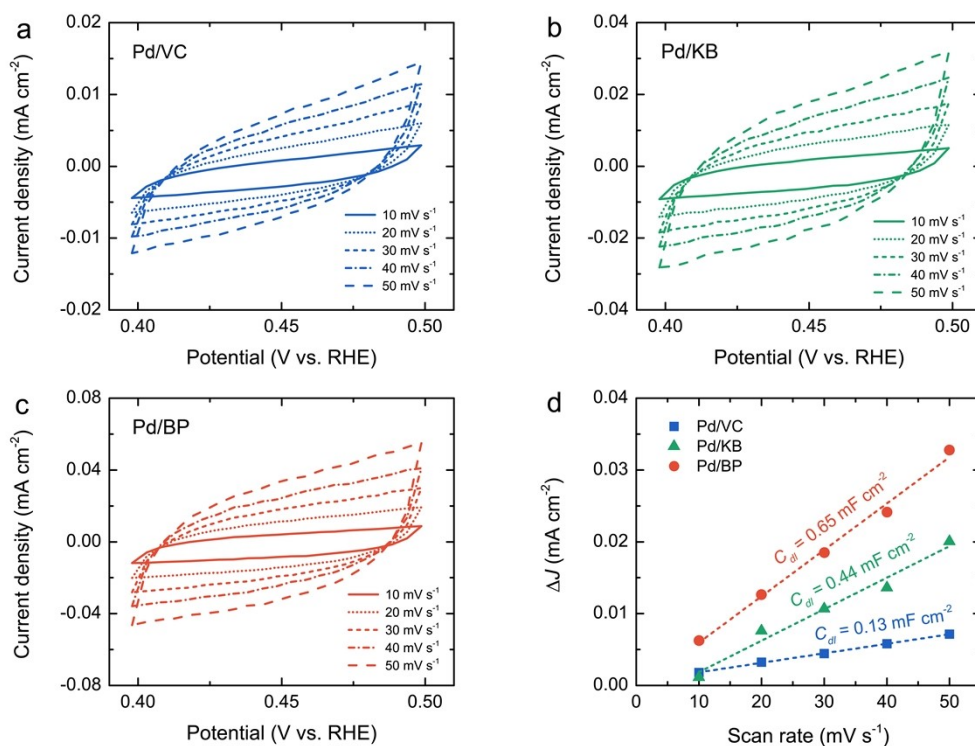

**Fig. S4.** CV curves recorded in the non-Faradaic regions (0.4–0.5 V) in  $N_2$ -saturated 0.5 M  $H_2SO_4$  solution at various scan rates from 10 to 50  $mV s^{-1}$  of (a) Pd/VC, (b) Pd/KB, and (c) Pd/BP. (d) Average non-Faradaic current density ( $\Delta J = (J_{anode} - J_{cathode})/2$ ) obtained from CV curves at 0.45 V as a function of the scan rate.

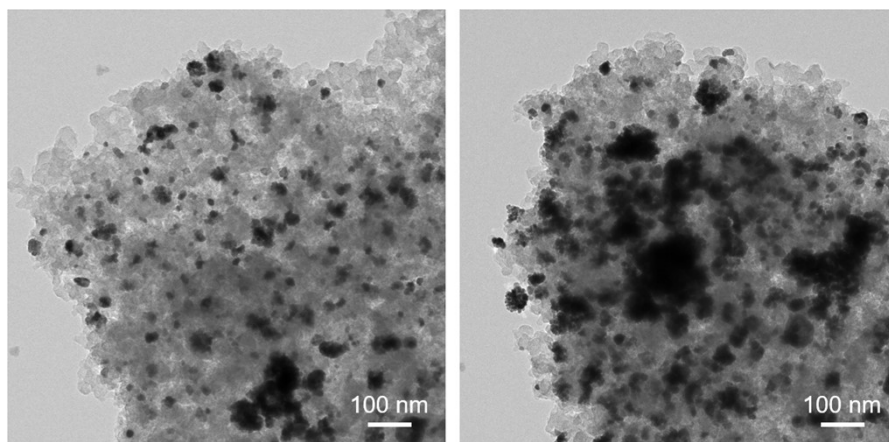

**Fig. S5.** FE-TEM images of Pd/BP after stability tests for 2000 cycles.
